# Supplementary material for: Multiple electron injection dynamics in linearly-linked two dye co-sensitized nanocrystalline metal oxide electrodes for dye-sensitized solar cells
Source: Royal Society of Chemistry journal article supplement (doi:10.1039/c2cp23522f), 2012-01-01
Supplement: c2cp23522f.pdf [file c2cp23522f.pdf]

## Supporting information

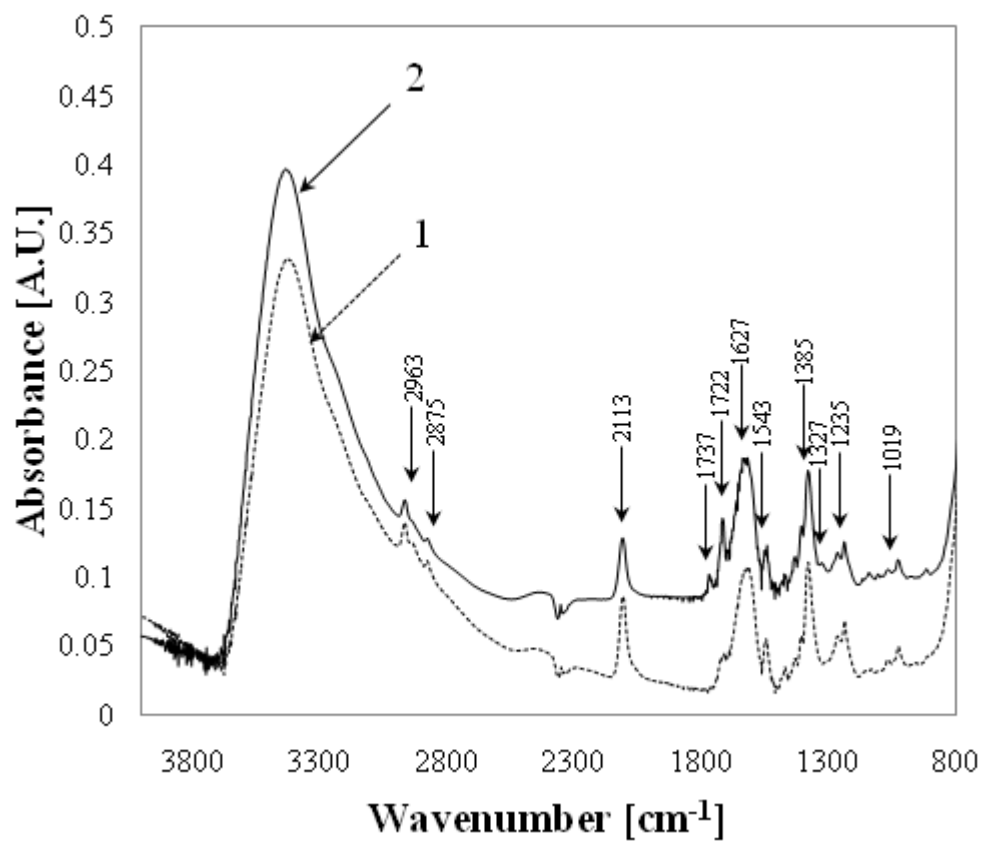

Fig. S1 Fourier Transform infrared (FT-IR) spectra of (1) N719 adsorbed on SnO<sub>2</sub> and (2) linearly linked N719-NcSn adsorbed on SnO<sub>2</sub>.
